# Supplementary material for: Level of education is associated with coronary heart disease and chronic kidney disease in individuals with type 2 diabetes: a population-based study
Source: HighWire-hosted journal article supplement (doi:10.1136/bmjdrc-2022-002867), 2022-09-01
Supplement: bmjdrc-2022-002867supp004_data_supplement.pdf [file bmjdrc-2022-002867supp004_data_supplement.pdf]

Supplementary Table 3. Odds ratio (OR) and 95% confidence interval (CI) for having vascular complications in type 2 diabetes patients, by education level, complete cases.

|                                                                              | Unadjusted        |         | Model 1           |         | Model 2           |         |
|------------------------------------------------------------------------------|-------------------|---------|-------------------|---------|-------------------|---------|
|                                                                              | OR (95% CI)       | p-value | OR (95% CI)       | p-value | OR (95% CI)       | p-value |
| <b>Coronary heart disease, n=5073</b>                                        |                   |         |                   |         |                   |         |
| Education level                                                              |                   | <0.001  |                   | <0.001  |                   | <0.001  |
| Compulsory education                                                         | 1                 |         | 1                 |         | 1                 |         |
| Upper secondary education                                                    | 0.84 (0.73, 0.97) | 0.019   | 0.79 (0.68, 0.92) | 0.003   | 0.79 (0.68, 0.92) | 0.003   |
| Higher education                                                             | 0.56 (0.46, 0.69) | <0.001  | 0.54 (0.43, 0.67) | <0.001  | 0.54 (0.43, 0.68) | <0.001  |
| <b>Stroke, n=5080</b>                                                        |                   |         |                   |         |                   |         |
| Education level                                                              |                   | 0.013   |                   | 0.042   |                   | 0.055   |
| Compulsory education                                                         | 1                 |         | 1                 |         | 1                 |         |
| Upper secondary education                                                    | 0.72 (0.57, 0.91) | 0.006   | 0.74 (0.58, 0.94) | 0.014   | 0.75 (0.59, 0.95) | 0.017   |
| Higher education                                                             | 0.71 (0.51, 0.98) | 0.039   | 0.78 (0.56, 1.09) | 0.141   | 0.81 (0.58, 1.14) | 0.225   |
| <b>Chronic kidney disease (eGFR &lt;60 ml/min/1.73m<sup>2</sup>), n=5057</b> |                   |         |                   |         |                   |         |
| Education level                                                              |                   | <0.001  |                   | 0.093   |                   | 0.128   |
| Compulsory education                                                         | 1                 |         | 1                 |         | 1                 |         |
| Upper secondary education                                                    | 0.67 (0.57, 0.79) | <0.001  | 0.83 (0.69, 1.00) | 0.052   | 0.84 (0.69, 1.01) | 0.065   |
| Higher education                                                             | 0.53 (0.42, 0.68) | <0.001  | 0.79 (0.60, 1.04) | 0.093   | 0.81 (0.61, 1.07) | 0.131   |
| <b>Retinopathy, n=3496</b>                                                   |                   |         |                   |         |                   |         |
| Education level                                                              |                   | 0.243   |                   | 0.067   |                   | 0.304   |
| Compulsory education                                                         | 1                 |         | 1                 |         | 1                 |         |
| Upper secondary education                                                    | 0.83 (0.66, 1.05) | 0.114   | 0.77 (0.61, 0.97) | 0.028   | 0.82 (0.64, 1.05) | 0.123   |
| Higher education                                                             | 0.83 (0.60, 1.13) | 0.234   | 0.76 (0.56, 1.05) | 0.098   | 0.89 (0.64, 1.25) | 0.515   |
| <b>Foot complications, n=5089</b>                                            |                   |         |                   |         |                   |         |
| Education level                                                              |                   | 0.052   |                   | 0.066   |                   | 0.352   |
| Compulsory education                                                         | 1                 |         | 1                 |         | 1                 |         |
| Upper secondary education                                                    | 0.78 (0.59, 1.03) | 0.083   | 0.77 (0.58, 1.03) | 0.077   | 0.84 (0.63, 1.12) | 0.238   |
| Higher education                                                             | 0.63 (0.41, 0.95) | 0.026   | 0.64 (0.42, 0.98) | 0.038   | 0.77 (0.50, 1.17) | 0.219   |
